# Supplementary material for: The membrane protein ANKH is crucial for bone mechanical performance by mediating cellular export of citrate and ATP
Source: PubMed Central journal article supplement (PMC7371198; doi:10.1371/journal.pgen.1008884), 2020-07-08
Supplement: pgen.1008884.s002.pdf [file pgen.1008884.s002.pdf]

## Intracellular ATP

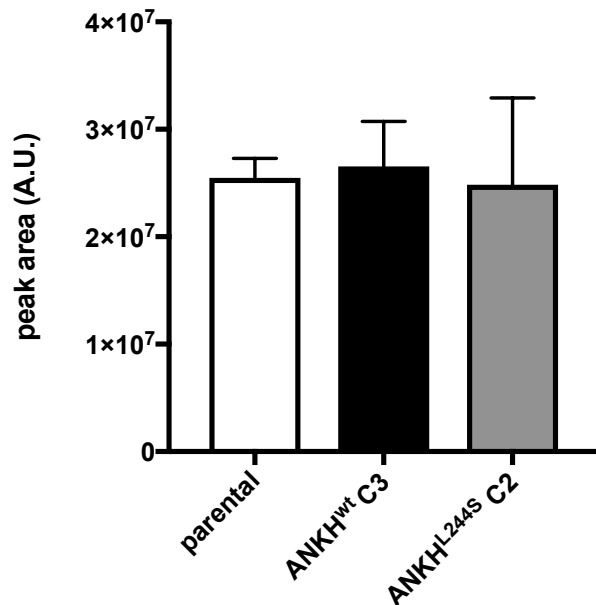

**S2\_Fig.** Relative amounts of ATP determined by LC/MS in cell pellets of HEK293 parental, HEK293-*ANKH*<sup>wt</sup> and HEK293-*ANKH*<sup>L244S</sup> cells grown in wells of a 6-well plate as described in the materials and methods section. Data represent mean +/- SD of an experiment performed in triplicate.
