# Supplementary material for: The membrane protein ANKH is crucial for bone mechanical performance by mediating cellular export of citrate and ATP
Source: PubMed Central journal article supplement (PMC7371198; doi:10.1371/journal.pgen.1008884), 2020-07-08
Supplement: pgen.1008884.s003.pdf [file pgen.1008884.s003.pdf]

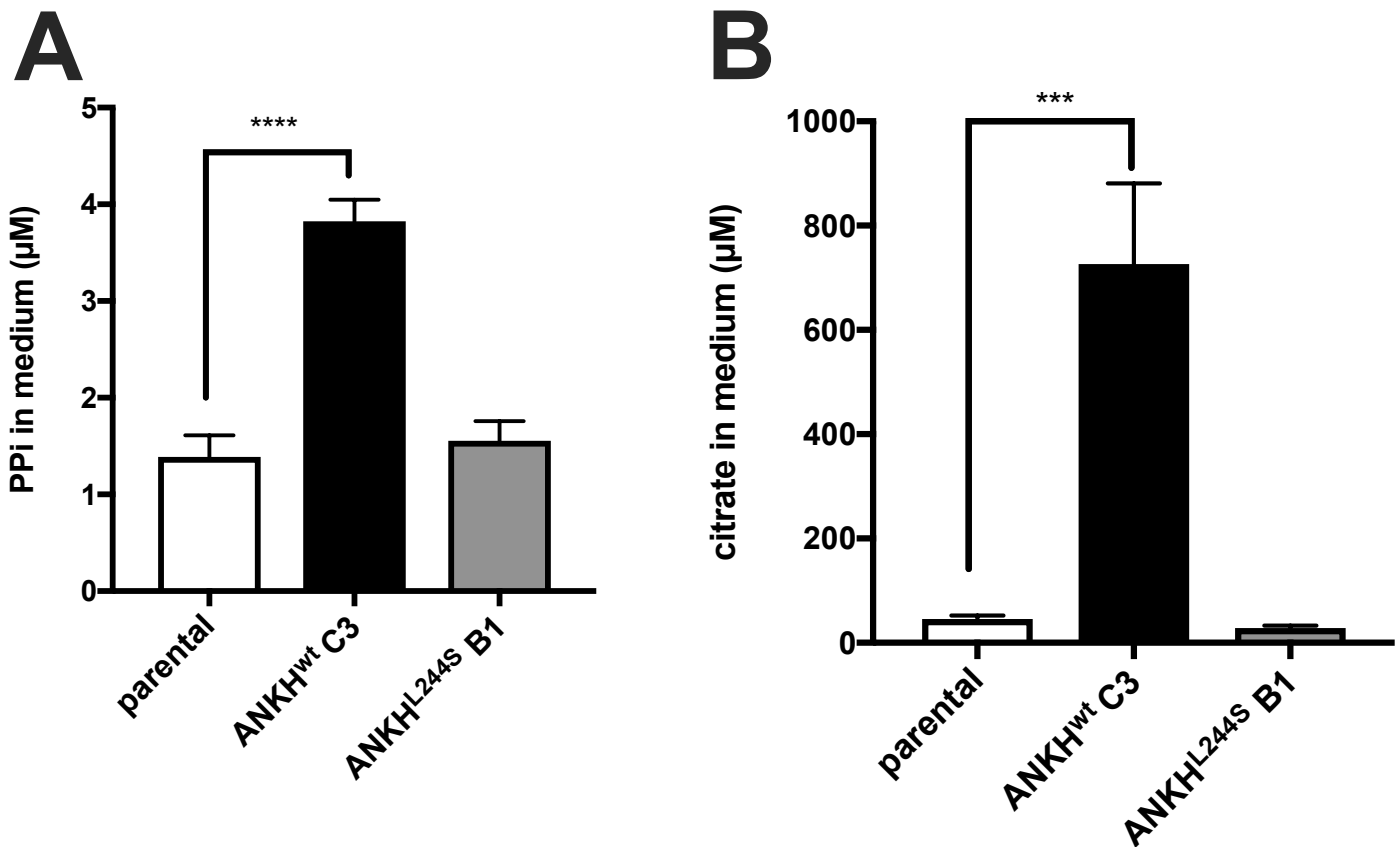

**S3 Fig.** The L244S mutation completely inactivates ANKH as determined by following extracellular PPI (**A**) and citrate release (**B**) in culture medium by an independent HEK293 clone (B1) that stably overproduces ANKH<sup>L244S</sup>. Concentrations of PPI and citrate were determined in 24-hour medium samples of parental HEK293 cells, HEK293 cells stably overproducing ANKH<sup>wt</sup> (clone C3) and HEK293 cells overproducing ANKH<sup>L244S</sup> (clone B1). Statistical significance was determined by ANOVA with Tukey correction. \*\*\*  $p < 0.001$ ; \*\*\*\*  $p < 0.0001$ , ANKH<sup>wt</sup> C3 vs parental.
